# Supplementary material for: Cardo Polybenzimidazole (PBI-O-PhT) Based Membrane Reinforced with m-polybenzimidazole Electrospun Nanofiber Mat for HT-PEM Fuel Cell Applications
Source: MDPI journal article supplement (doi:10.3390/membranes12100956), 2022-09-29
Supplement: s1 [file s1]

## Supplementary Information

# Cardo polybenzimidazole (PBI-O-PhT) based membrane reinforced with *m*-polybenzimidazole electrospun nanofiber mat for HT-PEM fuel cell applications

Igor I. Ponomarev <sup>1</sup>, Kirill M. Skupov <sup>1,\*</sup>, Alexander D. Modestov <sup>2</sup>, Anna A. Lysova <sup>3</sup>, Ivan I. Ponomarev <sup>1</sup> and Elizaveta S. Vtyurina <sup>1</sup>

<sup>1</sup>A.N. Nesmeyanov Institute of Organoelement Compounds of Russian Academy of Sciences, Vavilova St., 28, bld. 1, 119334 Moscow, Russia

<sup>2</sup>A.N. Frumkin Institute of Physical Chemistry and Electrochemistry of Russian Academy of Sciences, Leninsky Av., 31, bld. 4., 119071 Moscow, Russia

<sup>3</sup>Kurnakov Institute of General and Inorganic Chemistry, Leninsky Av., 31, 119071 Moscow, Russia

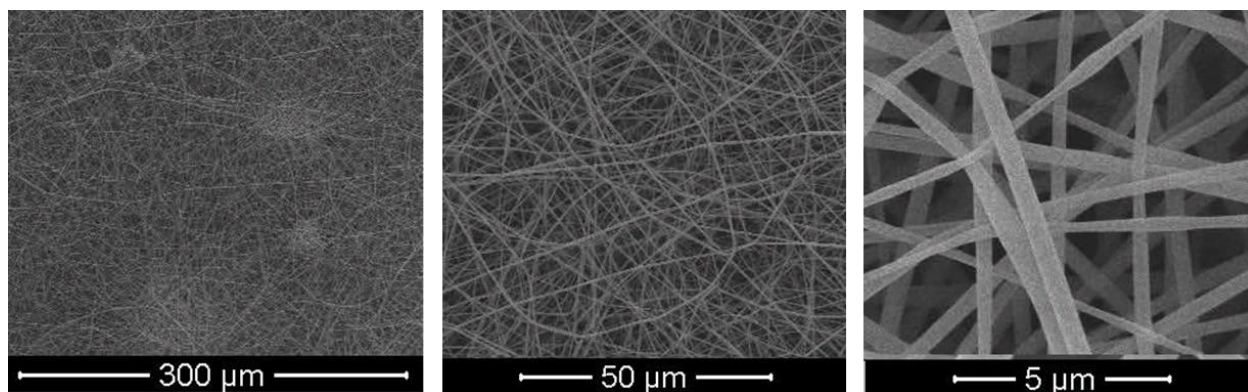

**Figure S1.** SEM of *m*-PBI electrospun nanofibers on aluminum foil.

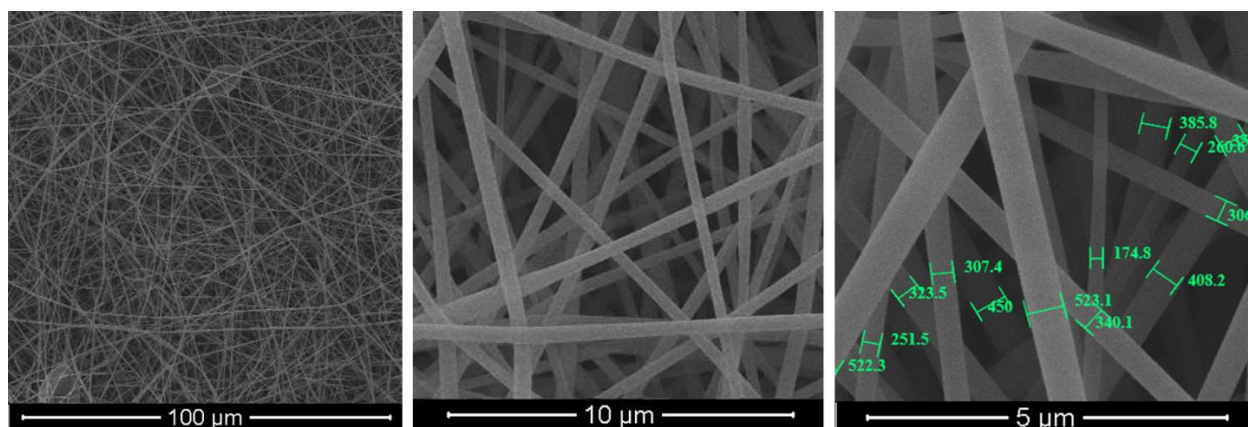

**Figure S2.** SEM of stabilized *m*-PBI electrospun nanofibers on aluminum foil.

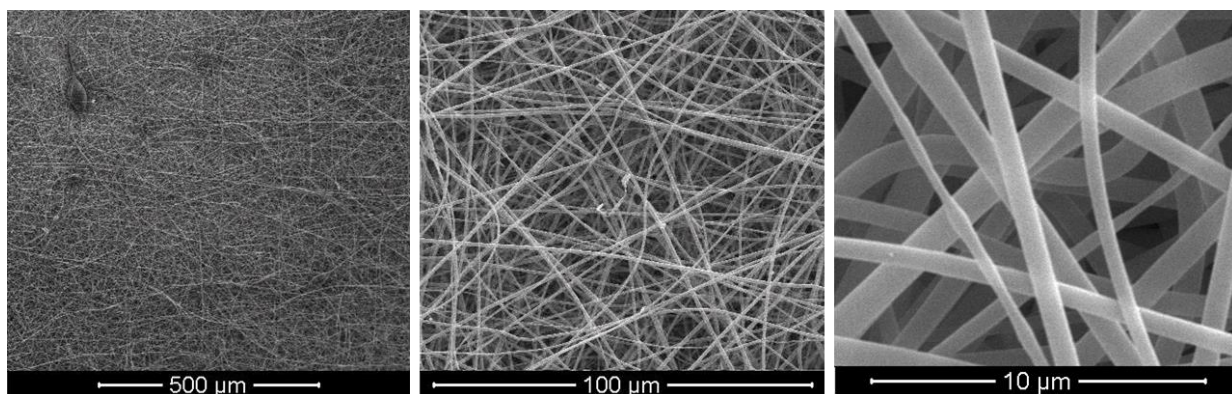

**Figure S3.** SEM of *m*-PBI electrospun nanofibers on siliconized paper.

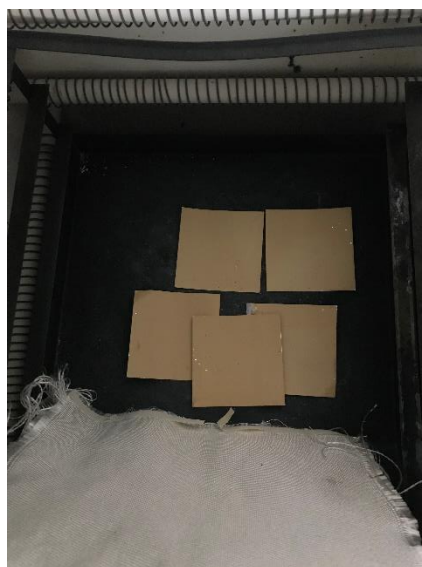

**Figure S4.** A photo of stabilized *m*-PBI electrospun nanofibers on aluminum foil.

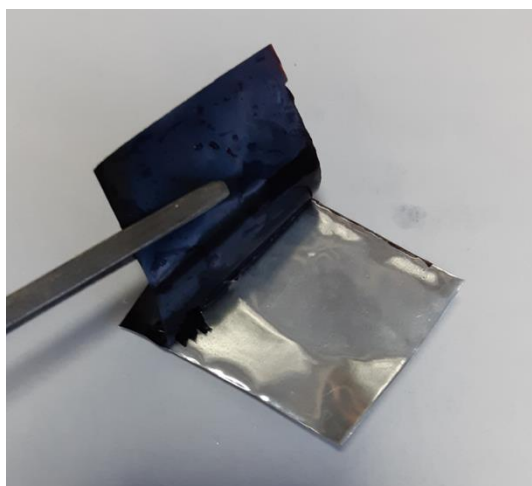

**Figure S5.** The composite reinforced membrane after crosslinking on aluminum foil.

## Polarization curves

polarization curves, 180 °C, cathode - commercial Celtec®P1000 cathode  
initial

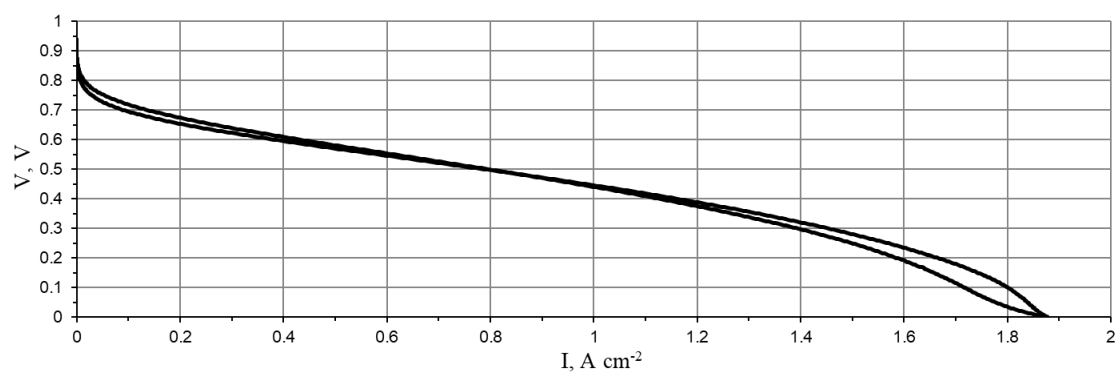

after 20 start-stop cycles

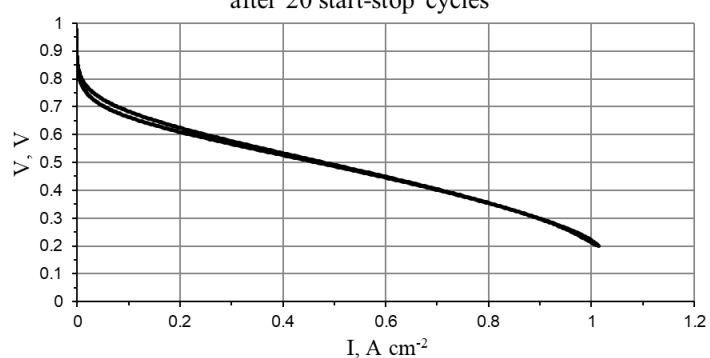

polarization curves, 180 °C, CNF cathode  
initial

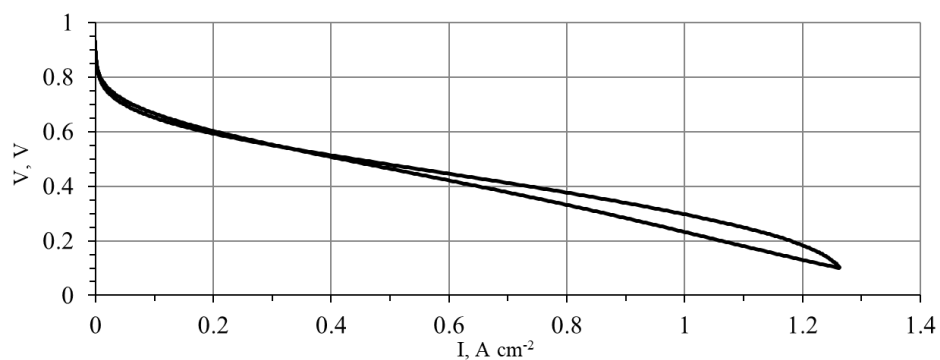

After 20 start-stop cycles

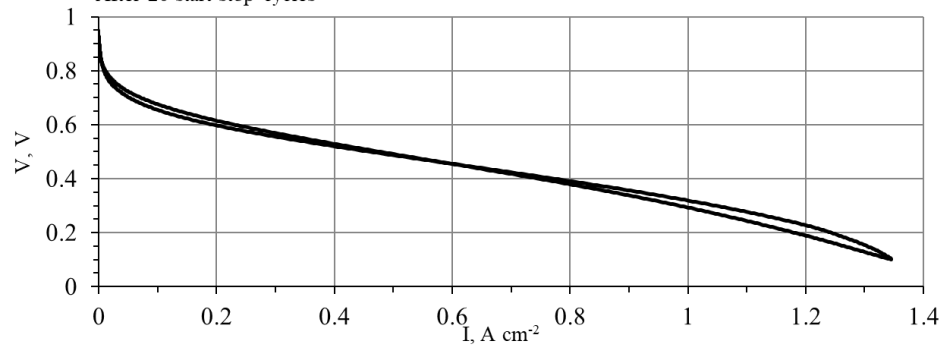

**Figure S6.** Polarization curves.
